# Supplementary material
Source: MDPI journal article supplement (https://www.mdpi.com/2071-1050/13/18/10151)
Supplement: s1 [file s1]

# Effect of Elevation on Variation in Reference Evapotranspiration under Climate Change in Northwest China

Wei Liu <sup>1</sup>, Linshan Yang <sup>1,\*</sup>, Meng Zhu <sup>1</sup>, Jan F. Adamowski <sup>2</sup>, Rahim Barzegar <sup>2</sup>, Xiaohu Wen <sup>1</sup> and Zhenliang Yin <sup>1</sup>

<sup>1</sup> Key Laboratory of Ecohydrology of Inland River Basin, Northwest Institute of Eco-Environment and Resources, Chinese Academy of Sciences, Lanzhou, Gansu 730000, China; weiliu@lzb.ac.cn (W.L.); yanglsh08@lzb.ac.cn (L.Y.); zhume@lzb.ac.cn (M.Z.); xhwen@lzb.ac.cn (X.W.); yinzhenliang@lzb.ac.cn (Z.Y.); <sup>2</sup> Department of Bioresource Engineering, Faculty of Agricultural & Environmental Sciences, McGill University, Québec H9X 3V9, Canada; jan.adamowski@mcgill.ca (J.A.); rahim.barzegar@mcgill.ca (R.B.).  
\* Correspondence: yanglsh08@lzb.ac.cn

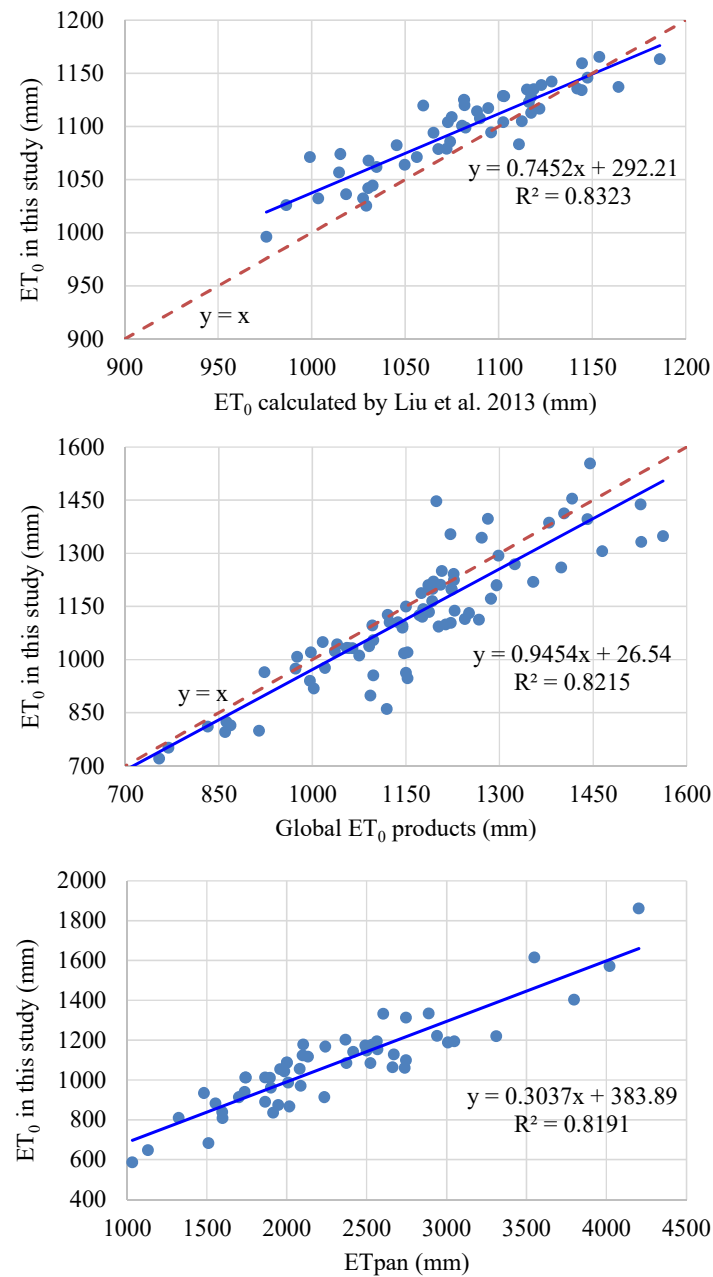

**Figure S1.** Comparison of ET<sub>0</sub> calculated in this study with other ET<sub>0</sub> calculation (regional time series from 1960 to 2010), product (station averaged from 1970 to 2000) and ETpan (station averaged from 1981 to 2010) in NWC.

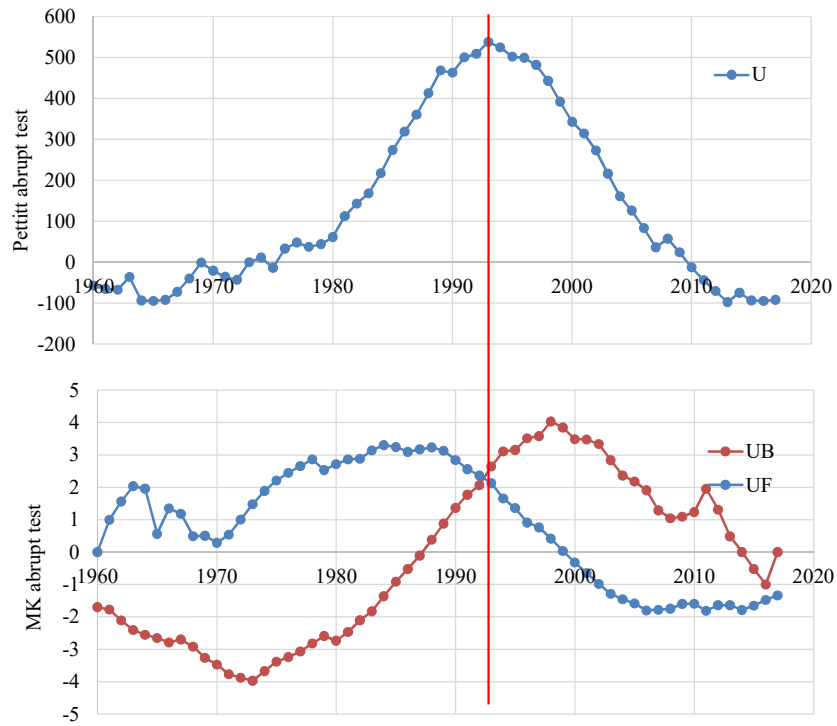

**Figure S2.** Comparison of the abrupt change test between MK and Pettitt methods.

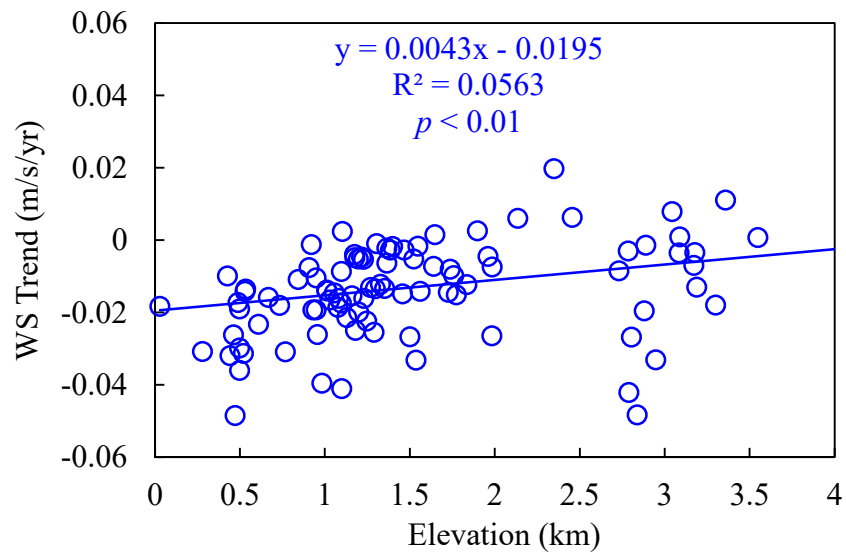

**Figure S3.** Correlation of wind speed trends with respect to the elevation in NWC.

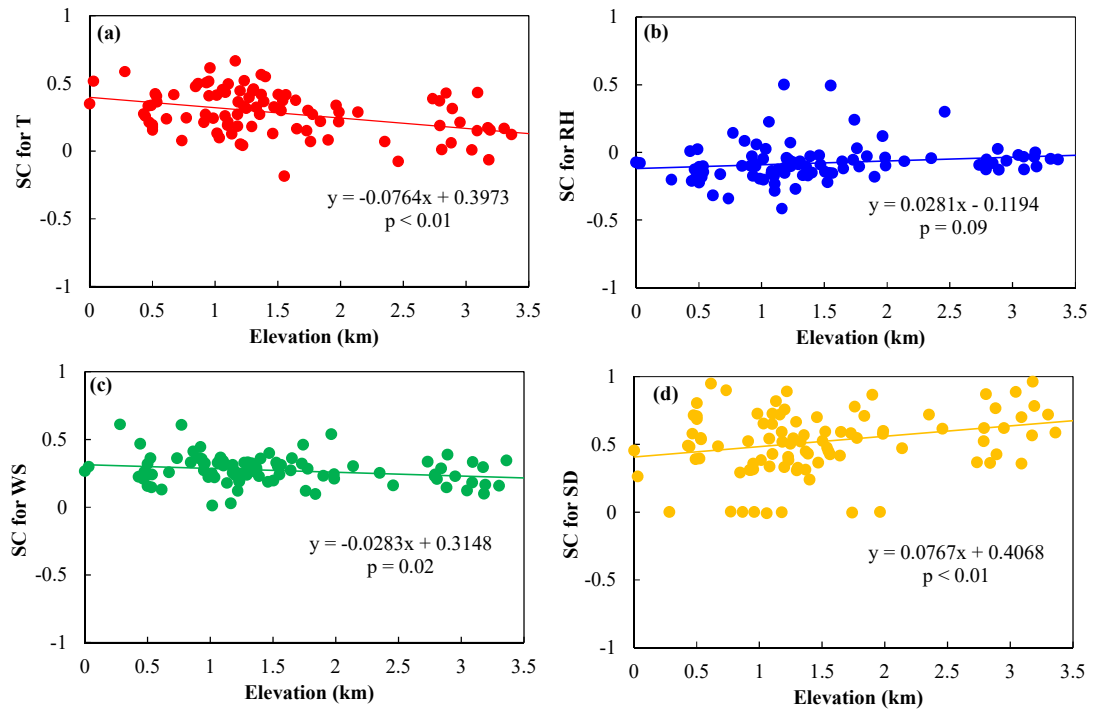

**Figure S4.** Relationship between elevation and annual  $ET_0$  sensitivity coefficients (SC) for (a) average air temperature (T), (b) relative humidity (RH), (c) wind speed (WS) and (d) sunshine duration (SD) in NWC.
